# Supplementary material for: Spatiotemporal complexity patterns of resting‐state bioelectrical activity explain fluid intelligence: Sex matters
Source: PubMed Central journal article supplement (PMC7643359; doi:10.1002/hbm.25162), 2020-08-18
Supplement: HBM-41-4846-s002.pdf [file HBM-41-4846-s002.pdf]

## S.2. Complexity patterns in relations to the *gf* factor: PLSR analysis

Table S1

Complexity (*MMSE* features) pattern relevant to *gf* obtained from PLSR analysis in overall sample ( $N = 119$ ), 3 LVs

| variable                  | Actual       | 2.5%         | 97.5%         | boot.mean    | Skewness      | Bias           | SE         |
|---------------------------|--------------|--------------|---------------|--------------|---------------|----------------|------------|
| AUC <sub>F</sub>          | -0.044458588 | -0.108117663 | 0.0180149873  | -0.041936380 | -0.1799129751 | 2.522207e-03   | 0.03198081 |
| AUC <sub>FL</sub>         | 0.075646389  | 0.018810518  | 0.1285784200  | 0.072833984  | 0.1014188680  | -2.812405e-03  | 0.02757010 |
| AUC <sub>FR</sub>         | 0.009973641  | -0.043939655 | 0.0792659749  | 0.014044283  | 0.2832774336  | 4.070642e-03   | 0.03156975 |
| AUC <sub>C</sub>          | -0.030443747 | -0.132023164 | 0.0664607023  | -0.033017101 | 0.0001183775  | -2.573354e-03  | 0.05018292 |
| AUC <sub>P</sub>          | 0.048897917  | -0.033736242 | 0.1336820436  | 0.046979740  | 0.1249803003  | -1.918177e-03  | 0.04215635 |
| AUC <sub>PL</sub>         | -0.004884235 | -0.067575405 | 0.0557816013  | -0.006469801 | 0.0413529575  | -1.585566e-03  | 0.03183562 |
| AUC <sub>PR</sub>         | -0.050638180 | -0.095508678 | 0.0001142901  | -0.048638005 | 0.0939075500  | 2.000174e-03   | 0.02435887 |
| AUC <sub>ML</sub>         | -0.034087407 | -0.108785186 | 0.0439602079  | -0.031174960 | -0.0518949361 | 2.912448e-03   | 0.03879305 |
| AUC <sub>MR</sub>         | 0.030317496  | -0.052027041 | 0.0993789381  | 0.024806544  | -0.0847754404 | -5.510952e-03  | 0.03886186 |
| AUC <sub>F-P</sub>        | -0.084057794 | -0.156827248 | -0.0072892502 | -0.079947823 | -0.1169534133 | 4.109972e-03   | 0.03822534 |
| AUC <sub>FL-FR</sub>      | 0.071240328  | -0.019693545 | 0.1329311764  | 0.062154899  | 0.062154899   | -9.085428e-03  | 0.03879551 |
| AUC <sub>PL-PR</sub>      | 0.045570332  | -0.012579228 | 0.0942635020  | 0.042107657  | -0.0329816057 | -3.462675e-03  | 0.02703947 |
| AUC <sub>ML-MR</sub>      | -0.064224017 | -0.124524120 | 0.0196424121  | -0.055922168 | 0.1245579662  | 8.301849e-03   | 0.03666857 |
| AUC <sub>FL-PL</sub>      | 0.070091359  | 0.016519873  | 0.1229117640  | 0.068764923  | 0.0451369327  | -1.3226436e-03 | 0.02712467 |
| AUC <sub>FR-PR</sub>      | 0.052701817  | 0.008617555  | 0.1069704572  | 0.054795034  | 0.1792207559  | 2.093217e-03   | 0.02488329 |
| AvgEnt <sub>F</sub>       | -0.050999752 | -0.129364937 | 0.0204516040  | -0.049326184 | -0.2723894168 | 1.673569e-03   | 0.03798302 |
| AvgEnt <sub>FL</sub>      | 0.119594431  | 0.058498761  | 0.1787837359  | 0.115985328  | 0.2220926989  | -3.609103e-03  | 0.03077424 |
| AvgEnt <sub>FR</sub>      | -0.001256433 | -0.044647258 | 0.0518643438  | 0.001633240  | 0.1200324405  | 2.889673e-03   | 0.02441029 |
| AvgEnt <sub>C</sub>       | -0.018012899 | -0.131985201 | 0.0820414299  | -0.022251236 | -0.1520496133 | -4.238338e-03  | 0.05448578 |
| AvgEnt <sub>P</sub>       | 0.112545097  | 0.029775328  | 0.1863201856  | 0.108047462  | 0.0218210084  | -4.497635e-03  | 0.03981848 |
| AvgEnt <sub>PL</sub>      | 0.026138682  | -0.049567588 | 0.0903463993  | 0.022450503  | -0.1460104448 | -3.688179e-03  | 0.03555700 |
| AvgEnt <sub>PR</sub>      | 0.031892216  | -0.033793466 | 0.1072748343  | 0.034016485  | 0.1281449483  | 2.124269e-03   | 0.03580550 |
| AvgEnt <sub>ML</sub>      | -0.004826474 | -0.090877758 | 0.0756229760  | -0.006073360 | -0.0569322975 | -1.246886e-03  | 0.04259522 |
| AvgEnt <sub>MR</sub>      | 0.013275234  | -0.068076384 | 0.0766685664  | 0.006903750  | -0.1641031340 | -6.371484e-03  | 0.03659720 |
| AvgEnt <sub>F-P</sub>     | -0.134129062 | -0.209170942 | -0.0497085987 | -0.128863709 | -0.0736620873 | 5.265353e-03   | 0.04066527 |
| AvgEnt <sub>FL-FR</sub>   | 0.132772940  | 0.053173811  | 0.1960148994  | 0.125119768  | -0.0350624588 | -7.653172e-03  | 0.03624528 |
| AvgEnt <sub>PL-PR</sub>   | -0.009760815 | -0.086925577 | 0.0515206778  | -0.014642225 | -0.1618540336 | -4.881409e-03  | 0.03548553 |
| AvgEnt <sub>ML-MR</sub>   | -0.018931711 | -0.092536436 | 0.0697374764  | -0.013173918 | 0.1230082235  | 5.757794e-03   | 0.04149935 |
| AvgEnt <sub>FL-PL</sub>   | 0.082408216  | 0.019257527  | 0.1506772864  | 0.081911858  | 0.2432007478  | -4.963574e-04  | 0.03362386 |
| AvgEnt <sub>FR-PR</sub>   | -0.030320601 | -0.086358928 | 0.0260848126  | -0.029825591 | 0.0102633267  | 4.950099e-04   | 0.02850987 |
| MaxSlope <sub>F</sub>     | 0.025660699  | -0.030491982 | 0.1003322073  | 0.030204664  | 0.2956200667  | 4.543947e-03   | 0.03347006 |
| MaxSlope <sub>FL</sub>    | -0.017931016 | -0.066631612 | 0.0282983297  | -0.017236964 | -0.1588755488 | 6.940520e-04   | 0.02445671 |
| MaxSlope <sub>FR</sub>    | 0.002672783  | -0.056728451 | 0.0613909085  | 0.002712921  | 0.0277309216  | 4.013766e-05   | 0.02995712 |
| MaxSlope <sub>C</sub>     | -0.018671232 | -0.118832849 | 0.0876071313  | -0.018342234 | 0.1644713084  | 3.289985e-04   | 0.05270997 |
| MaxSlope <sub>P</sub>     | -0.031790614 | -0.110201147 | 0.0557216550  | -0.029227591 | 0.1032174073  | 2.563023e-03   | 0.04236725 |
| MaxSlope <sub>PL</sub>    | -0.020543378 | -0.116506468 | 0.0787821253  | -0.018597287 | 0.0290478846  | 1.946092e-03   | 0.05070137 |
| MaxSlope <sub>PR</sub>    | -0.138848273 | -0.232990385 | -0.0297582826 | -0.131153611 | -0.0153640049 | 7.694662e-03   | 0.05218916 |
| MaxSlope <sub>ML</sub>    | -0.102156352 | -0.177079530 | 0.05161735062 | -0.097016280 | -0.0232412168 | 5.140073e-03   | 0.04109944 |
| MaxSlope <sub>MR</sub>    | 0.038565803  | -0.075214126 | 0.1338256558  | 0.035084208  | -0.2632462445 | -3.481595e-03  | 0.05324328 |
| MaxSlope <sub>F-P</sub>   | 0.043245418  | -0.030725112 | 0.1217842539  | 0.045435225  | 0.0260744269  | 2.189807e-03   | 0.03850447 |
| MaxSlope <sub>FL-FR</sub> | -0.025310720 | -0.106451248 | 0.0508129326  | -0.024697693 | -0.1322159081 | 6.130268e-04   | 0.03958887 |
| MaxSlope <sub>ML-MR</sub> | -0.133647549 | -0.205889147 | -0.0387509360 | -0.125965734 | 0.1866959602  | 7.681815e-03   | 0.04269145 |
| MaxSlope <sub>FL-PL</sub> | -0.005638562 | -0.071050957 | 0.0609299814  | -0.005595331 | -0.0225220069 | 4.323109e-05   | 0.03357138 |
| MaxSlope <sub>FR-PR</sub> | 0.083471802  | 0.010741964  | 0.1533476862  | 0.080465280  | 0.1171849283  | -3.006522e-03  | 0.03644389 |
| MaxSlope <sub>PL-PR</sub> | 0.101431439  | 0.022094111  | 0.1784352429  | 0.096948729  | 0.1873093261  | -4.482710e-03  | 0.03979018 |

Table S2

Complexity (*MMSE* features) pattern relevant to *gf* obtained from PLSR analysis in men ( $N = 55$ ), 8 LVs, local minimum

| variable                  | Actual       | 2.5%        | 97.5%         | boot.mean    | Skewness     | Bias         | SE         |
|---------------------------|--------------|-------------|---------------|--------------|--------------|--------------|------------|
| AUC <sub>F</sub>          | -0.162994053 | -0.32044097 | 0.0354973861  | -0.147776887 | 0.112134844  | 0.015217165  | 0.09113638 |
| AUC <sub>FL</sub>         | -0.008303939 | -0.20924288 | 0.2137331778  | 0.001744176  | -0.001882610 | 0.010048115  | 0.10785784 |
| AUC <sub>FR</sub>         | 0.044523033  | -0.10964313 | 0.2037451464  | 0.058244677  | -0.310998215 | 0.013721644  | 0.08014549 |
| AUC <sub>C</sub>          | -0.153679792 | -0.35037592 | 0.0999287972  | -0.137612413 | 0.179716960  | 0.016067379  | 0.11632676 |
| AUC <sub>P</sub>          | 0.283429345  | -0.04660017 | 0.4637697291  | 0.212687220  | -0.095673311 | -0.070742125 | 0.13016801 |
| AUC <sub>PL</sub>         | 0.194947796  | -0.07803578 | 0.3563432760  | 0.143544490  | -0.089460095 | -0.051403306 | 0.11044430 |
| AUC <sub>PR</sub>         | -0.031261464 | -0.26301771 | 0.1488430746  | -0.037538748 | -0.433467100 | -0.006277284 | 0.10420453 |
| AUC <sub>ML</sub>         | 0.031898526  | -0.21221120 | 0.2923788682  | 0.045731774  | -0.109961167 | 0.013833248  | 0.12951737 |
| AUC <sub>MR</sub>         | 0.099569487  | -0.16788169 | 0.3058493500  | 0.076532757  | -0.134439725 | -0.023036730 | 0.12022030 |
| AUC <sub>F-P</sub>        | -0.362080027 | -0.46575625 | -0.0925929848 | -0.296616053 | 0.357242495  | 0.065463973  | 0.09520848 |
| AUC <sub>FL-FR</sub>      | -0.067919201 | -0.28274388 | 0.1524400180  | -0.076762588 | 0.235537232  | -0.008843387 | 0.11050679 |
| AUC <sub>PL-PR</sub>      | 0.166474981  | -0.04113335 | 0.3387504546  | 0.134433770  | 0.323827554  | -0.032041211 | 0.09755255 |
| AUC <sub>ML-MR</sub>      | -0.072915244 | -0.24933542 | 0.1771536543  | -0.036027328 | 0.018370449  | 0.036887916  | 0.10924400 |
| AUC <sub>FL-PL</sub>      | -0.163789015 | -0.31591242 | 0.0976883469  | -0.114313082 | 0.106407852  | 0.049475933  | 0.10598614 |
| AUC <sub>FR-PR</sub>      | 0.061941686  | -0.07950615 | 0.2544687005  | 0.079774710  | 0.162375493  | 0.017833024  | 0.08443613 |
| AvgEnt <sub>F</sub>       | -0.254077949 | -0.46930533 | -0.254077949  | -0.250346592 | 0.128651183  | 0.003731357  | 0.11534777 |
| AvgEnt <sub>FL</sub>      | 0.295455782  | 0.07718823  | 0.4298639604  | 0.252546495  | 0.023356295  | -0.042909288 | 0.08898567 |
| AvgEnt <sub>FR</sub>      | 0.081537390  | -0.09825209 | 0.1940974587  | 0.051537067  | -0.106210659 | -0.030000323 | 0.07373059 |
| AvgEnt <sub>C</sub>       | -0.368264931 | -0.57842691 | 0.0719906216  | -0.267749234 | 0.186329803  | 0.100515697  | 0.16625163 |
| AvgEnt <sub>P</sub>       | -0.079085862 | -0.28719207 | 0.1518015703  | -0.058868052 | -0.172446275 | 0.020217811  | 0.11176952 |
| AvgEnt <sub>PL</sub>      | -0.020688062 | -0.20170895 | 0.1851518290  | -0.012260824 | 0.096890477  | 0.008427239  | 0.09691455 |
| AvgEnt <sub>PR</sub>      | 0.301287234  | 0.07584958  | 0.4470458128  | 0.260401185  | 0.053254350  | -0.040886049 | 0.09479128 |
| AvgEnt <sub>ML</sub>      | 0.022554024  | -0.21895826 | 0.2002249298  | -0.010994177 | 0.020761584  | -0.033548201 | 0.10745487 |
| AvgEnt <sub>MR</sub>      | -0.086197506 | -0.33240237 | 0.1564106982  | -0.093026782 | 0.108283863  | -0.006829276 | 0.12464501 |
| AvgEnt <sub>F-P</sub>     | -0.172323372 | -0.37336695 | -0.0008611312 | -0.186217489 | 0.007737767  | -0.013894117 | 0.09448345 |
| AvgEnt <sub>FL-FR</sub>   | 0.195427989  | 0.00218042  | 0.3794990950  | 0.187210000  | 0.117546801  | -0.008217988 | 0.09619376 |
| AvgEnt <sub>PL-PR</sub>   | -0.292829398 | -0.42582395 | -0.0543559508 | -0.246004717 | 0.081247813  | 0.046824681  | 0.09337691 |
| AvgEnt <sub>ML-MR</sub>   | 0.115745913  | -0.11559700 | 0.2831467902  | 0.088739946  | -0.084290491 | -0.027005967 | 0.10076203 |
| AvgEnt <sub>FL-PL</sub>   | 0.278547502  | 0.04406129  | 0.4076295323  | 0.233460375  | -0.160741736 | -0.045087127 | 0.09152284 |
| AvgEnt <sub>FR-PR</sub>   | -0.195699018 | -0.39320597 | -0.0080191036 | -0.188987184 | -0.195671286 | 0.006711834  | 0.09785604 |
| MaxSlope <sub>F</sub>     | 0.191067246  | -0.04042043 | 0.4111735357  | 0.186104133  | -0.026432530 | -0.004963113 | 0.11539105 |
| MaxSlope <sub>FL</sub>    | -0.065230998 | -0.26477002 | 0.1370530178  | -0.061702448 | -0.026585110 | 0.003528550  | 0.10326422 |
| MaxSlope <sub>FR</sub>    | 0.102231864  | -0.10473614 | 0.3118679070  | 0.095713264  | 0.169482570  | -0.006518601 | 0.10559377 |
| MaxSlope <sub>C</sub>     | 0.400168249  | -0.02324516 | 0.5824301878  | 0.291546170  | -0.140756091 | -0.108622078 | 0.15641294 |
| MaxSlope <sub>P</sub>     | -0.146668201 | -0.31424064 | 0.1764542626  | -0.090773398 | 0.350055326  | 0.055894804  | 0.12414197 |
| MaxSlope <sub>PL</sub>    | -0.091250008 | -0.27913512 | 0.1786096205  | -0.062647830 | 0.252808283  | 0.028602178  | 0.11523126 |
| MaxSlope <sub>PR</sub>    | -0.299635382 | -0.44645251 | 0.1700839101  | -0.221814706 | 0.992290455  | 0.077820675  | 0.16151761 |
| MaxSlope <sub>ML</sub>    | -0.027407296 | -0.20187415 | 0.1913708147  | -0.011237712 | 0.085249314  | 0.016169584  | 0.10131075 |
| MaxSlope <sub>MR</sub>    | 0.010990493  | -0.17827336 | 0.2660064494  | 0.041657739  | 0.035876327  | 0.030667246  | 0.11246286 |
| MaxSlope <sub>F-P</sub>   | 0.276242509  | 0.02847091  | 0.4287762994  | 0.231883067  | -0.083951740 | -0.044359441 | 0.10016073 |
| MaxSlope <sub>FL-FR</sub> | -0.180379780 | -0.40111103 | 0.0526310933  | -0.169621586 | -0.075899104 | 0.010758194  | 0.11586469 |
| MaxSlope <sub>PL-PR</sub> | 0.146355927  | -0.10078401 | 0.3513549845  | 0.127846261  | -0.041427627 | -0.018509666 | 0.1144512  |
| MaxSlope <sub>ML-MR</sub> | -0.032406057 | -0.17839304 | 0.1064192943  | -0.040988132 | 0.143173590  | -0.008582075 | 0.07181432 |
| MaxSlope <sub>FL-PL</sub> | 0.023717854  | -0.14445372 | 0.1340923012  | 0.003532030  | -0.208879504 | -0.020185824 | 0.07016491 |
| MaxSlope <sub>FR-PR</sub> | 0.305190820  | 0.03382742  | 0.4464420172  | 0.254294959  | -0.201489214 | -0.050895861 | 0.10519168 |

Table S3

Complexity (*MMSE* features) pattern relevant to *gf* obtained from PLSR analysis in women ( $N = 62$ ), 1LV, randomization test,  $p < .05$

| variable                  | Actual       | CI 2.5%       | CI 97.5%      | boot.mean     | Skewness     | Bias          | SE          |
|---------------------------|--------------|---------------|---------------|---------------|--------------|---------------|-------------|
| AUC <sub>F</sub>          | -0.019810580 | -0.0498996887 | 0.0171963141  | -0.0177995883 | 0.195562252  | 0.0020109918  | 0.01686602  |
| AUC <sub>FL</sub>         | 0.029665582  | 0.0018218709  | 0.0659740512  | 0.0299637280  | 0.528607358  | 0.0002981462  | 0.01644989  |
| AUC <sub>FR</sub>         | -0.029879010 | -0.0535890255 | 0.0077860423  | -0.0270044242 | 0.513553315  | 0.0028745862  | 0.01542252  |
| AUC <sub>C</sub>          | -0.016036307 | -0.0426965709 | 0.0245065322  | -0.0132684868 | 0.581207160  | 0.0027678205  | 0.01690546  |
| AUC <sub>P</sub>          | -0.035538631 | -0.0605199762 | 0.0006466800  | -0.0327488600 | 0.408213460  | 0.0027897712  | 0.01499600  |
| AUC <sub>PL</sub>         | -0.028486093 | -0.0553007412 | 0.0141840193  | -0.0252682114 | 0.579940752  | 0.0032178819  | 0.01741940  |
| AUC <sub>PR</sub>         | -0.064448251 | -0.0853437101 | -0.0322133494 | -0.0600749523 | 0.284314051  | 0.0043732989  | 0.01338239  |
| AUC <sub>ML</sub>         | -0.021033188 | -0.0538913360 | 0.0136743543  | -0.0198247624 | 0.020599056  | 0.0012084252  | 0.01701706  |
| AUC <sub>MR</sub>         | 0.003430915  | -0.0293407611 | 0.0488616536  | 0.0050389502  | 0.509760176  | 0.0016080353  | 0.01998107  |
| AUC <sub>F-P</sub>        | 0.011212135  | -0.0265035138 | 0.0443266454  | 0.0104987624  | -0.212759735 | -0.0007133722 | 0.01787452  |
| AUC <sub>FL-FR</sub>      | 0.064377433  | 0.0310213461  | 0.0990446924  | 0.0616683343  | 0.517325682  | -0.0027090991 | 0.01688417  |
| AUC <sub>PL-PR</sub>      | 0.042233479  | 0.0006016148  | 0.0778286636  | 0.0398377511  | -0.104922537 | -0.0023957281 | 0.01950723  |
| AUC <sub>ML-MR</sub>      | -0.024037339 | -0.0698652107 | 0.0126138547  | -0.0244839337 | -0.405204242 | -0.0004465949 | 0.02110137  |
| AUC <sub>FL-PL</sub>      | 0.047677651  | 0.0100888744  | 0.0791768483  | 0.0452157656  | 0.022528584  | -0.0024618856 | 0.01724096  |
| AUC <sub>FR-PR</sub>      | 0.041162393  | 0.0004958166  | 0.0739584396  | 0.0386865498  | -0.160819137 | -0.0024758437 | 0.01857485  |
| AVG <sub>F</sub>          | -0.006401572 | -0.0413113169 | 0.0272998407  | -0.0065531465 | -0.076520960 | -0.0001551741 | 0.01730558  |
| AVG <sub>FL</sub>         | 0.039693846  | 0.0080459593  | 0.0690269280  | 0.0384449815  | 0.117059174  | -0.0012488647 | 0.01569618  |
| AVG <sub>FR</sub>         | -0.016581595 | -0.0480617729 | 0.0150457242  | -0.0161689944 | -0.005479939 | 0.0004126002  | 0.01586902  |
| AVG <sub>C</sub>          | -0.009552892 | -0.0362815223 | 0.0288543515  | -0.0076944052 | 0.548421671  | 0.0018584871  | 0.01623951  |
| AVG <sub>P</sub>          | -0.001975623 | -0.0303601093 | 0.0386630165  | -0.0004033763 | 0.613333823  | 0.0015722470  | 0.01743204  |
| AVG <sub>PL</sub>         | -0.008581601 | -0.0387010511 | 0.0321271370  | -0.0069342196 | 0.444881871  | 0.0016473815  | 0.01805192  |
| AVG <sub>PR</sub>         | -0.049028037 | -0.0740592435 | -0.0117693970 | -0.0454011758 | 0.472668356  | 0.0036268609  | 0.01562631  |
| AVG <sub>ML</sub>         | 0.005774193  | -0.0344474781 | 0.0430488159  | 0.0052019755  | -0.059925110 | -0.0005722178 | 0.01956663  |
| AVG <sub>MR</sub>         | 0.014757277  | -0.0196997630 | 0.0563026235  | 0.0152957964  | 0.348968465  | 0.0005385193  | 0.01921597  |
| AVG <sub>F-P</sub>        | -0.004342939 | -0.0481821646 | 0.0274638203  | -0.0059204098 | -0.508114757 | -0.0015774711 | 0.01926947  |
| AVG <sub>FL-FR</sub>      | 0.067140939  | 0.0354667312  | 0.1017644660  | 0.0644894890  | 0.618208583  | -0.0026514497 | 0.01675778  |
| AVG <sub>PL-PR</sub>      | 0.042590392  | 0.0010901313  | 0.0762062461  | 0.0400935920  | -0.182047438 | -0.0024967995 | 0.01903711  |
| AVG <sub>ML-MR</sub>      | -0.009310631 | -0.0566832006 | 0.0251053116  | -0.0105843573 | -0.446302877 | -0.0012737266 | 0.02091710  |
| AVG <sub>FL-PL</sub>      | 0.039945058  | 0.0030649751  | 0.0667968136  | 0.0368723831  | -0.255216614 | -0.0030726749 | 0.01598527  |
| AVG <sub>FR-PR</sub>      | 0.030033687  | -0.0125029598 | 0.0596357415  | 0.0276325954  | -0.436937855 | -0.0024010916 | 0.01819673  |
| MaxSlope <sub>F</sub>     | -0.014673499 | -0.0520664316 | 0.0317478928  | -0.0128471408 | 0.237815273  | 0.0018263581  | 0.02145045  |
| MaxSlope <sub>FL</sub>    | -0.006360103 | -0.0397852473 | 0.0343107076  | -0.0052754556 | 0.238743510  | 0.0010846477  | 0.01911136  |
| MaxSlope <sub>FR</sub>    | -0.016886081 | -0.0445300384 | 0.0331255468  | -0.0133068691 | 0.719929922  | 0.0035792119  | 0.01961382  |
| MaxSlope <sub>C</sub>     | -0.026881738 | -0.0581881022 | 0.0232484056  | -0.0242312156 | 0.631004534  | 0.0026505226  | 0.02069826  |
| MaxSlope <sub>P</sub>     | -0.036436045 | -0.0642035926 | -0.0003211618 | -0.0337407267 | 0.122993544  | 0.0026953185  | 0.01635130  |
| MaxSlope <sub>PL</sub>    | -0.030548980 | -0.0593336725 | 0.0077899310  | -0.0281396794 | 0.235246604  | 0.0024093005  | 0.01710759  |
| MaxSlope <sub>PR</sub>    | -0.061721831 | -0.0865206627 | -0.0294904509 | -0.0584462306 | 0.073931412  | 0.0032756005  | 0.01449188  |
| MaxSlope <sub>ML</sub>    | -0.048891093 | -0.0734104765 | -0.0168924848 | -0.0456560235 | 0.002236994  | 0.0032350695  | 0.01421261  |
| MaxSlope <sub>MR</sub>    | 0.004760853  | -0.0255653906 | 0.0530407972  | 0.0072053137  | 0.654189357  | 0.0024444609  | 0.02011785  |
| MaxSlope <sub>F-P</sub>   | 0.008270265  | -0.0390201622 | 0.0536958918  | 0.0078691892  | 0.008096539  | -0.0004010761 | 0.023690219 |
| MaxSlope <sub>FL-FR</sub> | 0.011181831  | -0.0353804579 | 0.0412600517  | 0.0084267542  | -0.544129967 | -0.0027550765 | 0.01941971  |
| MaxSlope <sub>PL-PR</sub> | 0.032514008  | -0.0030596796 | 0.0647732640  | 0.0309904043  | -0.069089029 | -0.0015236034 | 0.01751580  |
| MaxSlope <sub>ML-MR</sub> | -0.054282972 | -0.0928931956 | -0.0230691402 | -0.0531553721 | -0.578619013 | 0.0011275996  | 0.01788107  |
| MaxSlope <sub>FL-PL</sub> | 0.009759611  | -0.0270671207 | 0.0466113713  | 0.0092913753  | 0.019731368  | -0.0004682359 | 0.01893076  |
| MaxSlope <sub>FR-PR</sub> | 0.020133264  | -0.0159100116 | 0.0700872690  | 0.0217256397  | 0.446187040  | 0.0015923756  | 0.02207566  |



**Note.** Actual - regression coefficient, 95% CI - bias-corrected 95% bootstrapped confidence intervals, boot.mean - mean of the bootstrap, Skewness - skewness of the bootstrap distribution, Bias - estimate of bias, SE - estimate of bootstrap standard error. *Area under curve (AUC)*, obtained by trapezoidal approximation of the area delimited by the *MMSE* vector; the *AUC* feature may be viewed as the total complexity of the EEG signal represented by the *MMSE* vector; *MaxSlope*, defined as the maximum pairwise difference between first four elements (1:4 timescales) of the *MMSE* vector divided by indices' difference; the *MaxSlope* feature may be viewed as representing the maximum complexity change of the EEG signal at high-frequency fine-scales; *AvgEnt*, defined as the average value of the last four elements (9:12 timescales) of the *MMSE* vector; the *AvgEnt* feature may be viewed as representing the baseline value of entropy of the EEG signal at low-frequency coarse-scales. F – frontal, FL – frontal left, FR – frontal right, C – central, P -parietal, PL – parietal left, PR – parietal right, ML – middle left, MR – middle right.

We note that the PLS and MVDALAB packages, as used in this study, implement different PLSR algorithms: SIMPLS and BIDIAGPLS, respectively. However, the differences in the resulting PLSR models were unobservable on our data. R package implementing PLSR, the MVDALAB package (Afanador, Tran, Blanchet & Baumgartner, 2017).
